1 **The molecular basis of extensively drug-resistant *Salmonella* Typhi isolates**  
2 **from pediatric septicemia patients**

3

4 Chanmi Kim<sup>1,#</sup>, Iqra Latif<sup>2,#</sup>, Durga P. Neupane<sup>1</sup>, Gi Young Lee<sup>1</sup>, Ryan S. Kwon<sup>1</sup>, Alia Batool<sup>3</sup>,  
5 Qasim Ahmed<sup>3</sup>, Muhammad Usman Qamar<sup>2,\*</sup>, and Jeongmin Song<sup>1,\*</sup>

6 <sup>1</sup> Department of Microbiology and Immunology, College of Veterinary Medicine, Cornell  
7 University, Ithaca, New York 14853, USA

8 <sup>2</sup> Department of Microbiology, Faculty of Life Sciences, Government College University  
9 Faisalabad, 38000, Pakistan

10 <sup>3</sup> Department of Pathology, Fatima Memorial Hospital, Lahore, Pakistan.

11 # co-first authors. These authors contributed equally to this work.

12

13 \* co-senior authors. Correspondence and requests for materials should be addressed to Jeongmin

14 Song ([jeongmin.song@cornell.edu](mailto:jeongmin.song@cornell.edu), +1-607-253-4059) and/or Muhammad Usman Qamar

15 ([musmanqamar@gcuf.edu.pk](mailto:musmanqamar@gcuf.edu.pk))

16

17 **Running title:** XDR *Salmonella* Typhi isolates from children

18 **Key words:** Typhoid fever, Children, Septicemia, *Salmonella* Typhi, XDR, antimicrobial

19 resistance

20 **Abstract**

21 Sepsis is a syndromic response to infections and is becoming an emerging threat to the public  
22 health sector, particularly in developing countries. *Salmonella* Typhi (*S. Typhi*), the cause of  
23 typhoid fever, is one primary cause of pediatric sepsis in typhoid endemic areas. Extensively  
24 drug-resistant (XDR) *S. Typhi* is more common among pediatric patients, which is responsible  
25 for over 90% of the reported XDR typhoid cases, but the majority of antibiotic resistance studies  
26 available have been carried out using *S. Typhi* isolates from adult patients. Here, we  
27 characterized XDR *S. Typhi* isolates from a medium size cohort of pediatric typhoid patients to  
28 determine their antibiotic-resistance-related gene signatures associated with common treatment  
29 options to typhoid fever patients. This study informs the molecular basis of antibiotic-resistance  
30 among recent *S. Typhi* isolates from pediatric septicemia patients, therefore providing insights  
31 into the development of molecular detection methods and control strategies for XDR *S. Typhi*.

## 32 **Introduction**

33 Sepsis is a syndromic response to infections and is becoming an emerging threat to the public  
34 health sector. The World Health Organization (WHO) estimated that 48.9 million cases of sepsis  
35 have been reported and that one person dies every 2.58 seconds around the world (1).  
36 Furthermore, 20 million cases were detected among children, with 2.9 million deaths worldwide  
37 and 85% of these deaths in developing countries (1). *Salmonella enterica* serovar Typhi (*S.*  
38 Typhi), the causative agent of typhoid fever, is one primary cause of pediatric sepsis in typhoid  
39 endemic areas including Pakistan (1-3). Antibiotics are the primary treatment options for typhoid  
40 fever, but *Salmonella* are continuously evolving to acquire plasmid, prophage, transposon, or  
41 chromosomal gene mutation to attain resistance against antibiotics. A myriad of reports indicated  
42 the global spread of *S. Typhi* that is resistant to all of the first-line antibiotics, ampicillin,  
43 chloramphenicol, and co-trimoxazole, collectively known as multidrug-resistant (MDR) (4-8).  
44 All of the identified MDR *S. Typhi* carry the IncHI1 region located on either the plasmid or  
45 chromosome, which encodes several antibiotic-resistance genes, including *catA1* (conferring  
46 resistance to chloramphenicol), *blaTEM-1* (resistance to ampicillin), *dhfr7*, and *sul1* (resistance  
47 to trimethoprim-sulfamethoxazole), among other antibiotics-resistance-related genes found in  
48 MDR *S. Typhi* (4, 9-11).

49

50 Fluoroquinolones were used to treat MDR cases but became largely ineffective in some  
51 endemic regions. Fluoroquinolone-resistant *S. Typhi* encodes the quinolone resistance gene *qnrS*  
52 and point mutations in the quinolone resistance determining region (QRDR) harboring the genes  
53 for gyrase/topoisomerase II *gyrA* and *gyrB* and topoisomerase IV *parC* and *parE*. For instance,  
54 several point mutations occurred in *gyrA* have been correlated to resistance to fluoroquinolones,

55 including M52L, G81C, D82G, S83F/Y/L, D87N/G/A/Y/H, and A119E (10, 12-16). Point  
56 mutations in *gyrB*, *parC*, and *parE* have also been reported, while some variants have been  
57 reported only from certain geographical locations (13, 15-20). Some of those mutation sites are  
58 near the quinolone binding site, which in many cases results in the inhibition of the binding of  
59 antibiotics to topoisomerases (21). *S. Typhi* strains resistant to chloramphenicol, ampicillin, co-  
60 trimoxazole, fluoroquinolones, and third-generation cephalosporins were first reported in  
61 Hyderabad, Sindh, Pakistan, affecting over 300 cases in 2016 (9), collectively known as  
62 extensively drug-resistant (XDR) *S. Typhi* (8, 22). XDR *S. Typhi* isolates commonly harbor an  
63 IncY plasmid carrying the extended-spectrum  $\beta$ -lactamase resistance gene *blaCTX-M-15* and  
64 quinolone resistance gene *qnrS*, among others (9).

65  
66 Drug efflux pump systems also play a significant role in resistance to a wide range of  
67 antibiotics. *Salmonella spp.* possess five efflux pump families, including the ATP-binding  
68 cassette (ABC) MacAB-TolC system and resistance-nodulation-cell division (RND) AcrAB-  
69 TolC system (23). Members of the other families of drug transporters, major facilitator  
70 superfamily (MFS), multidrug and toxin extrusion (MATE), and small multidrug resistance  
71 (SMR), are located in the inner membrane (IM) of gram-negative bacteria (24). They usually  
72 function as independent units in the IM to translocate antibiotics across the membrane bilayer,  
73 followed by their cooperation with RND-type efflux pumps to pump out antibiotics across the  
74 entire cell envelope (24). In typhoidal *Salmonella*, point mutations at amino acid position 717  
75 (R717Q or R717L) on AcrB, the antibiotic-binding subunit of the RND-type AcrAB-TolC efflux  
76 pump, have been correlated with resistance to azithromycin in *S. Typhi* and *S. Paratyphi A*,  
77 respectively (19, 25, 26).

78

79           Antibiotic-resistant *S. Typhi* infection is more common among children; more than 90%  
80 of the XDR typhoid cases are currently from children younger than 15 years old of age (9, 27,  
81 28). The typhoid mortality in the pre-antibiotic era was approximately 25% (29). Typhoid fever  
82 is only partly preventable by vaccines, and two types of typhoid fever vaccines, the live-  
83 attenuated Ty21a and Vi and its conjugate subunit vaccines, are currently available (30). These  
84 vaccines exhibit the efficacy of approximately 55-85%, with the Vi-protein conjugate subunit  
85 vaccine being the most efficacious (30-32). The recent Vi-protein conjugate subunit vaccine has  
86 been demonstrated efficacious among children who are older than six months of age. There are  
87 no vaccines for early-life populations younger than six months available (31). Furthermore, *S.*  
88 *Typhi* strains that lack Vi have emerged in some endemic areas (33), which is most likely to  
89 make current subunit vaccines ineffective against those variants.

90

91           Macrolides (e.g., azithromycin) and carbapenems (e.g., imipenem, meropenem) remain to  
92 be “last resort” oral and injectable antibiotics for treating *S. Typhi* infection, respectively. *S.*  
93 *Typhi* strains resistant to macrolide azithromycin have been emerged (34). *S. Typhi* strains  
94 resistant to carbapenem antibiotic meropenem, have also been reported, and many cases of  
95 invasive nontyphoidal *Salmonellae* (NTS) resistant to carbapenems have been reported (25, 35-  
96 37). Given that typhoid fever vaccines and treatment options have limitations, there is an urgent  
97 need for closely monitoring drug-resistance profiles of *S. Typhi* strains at the point-of-care to  
98 provide valuable insights into the development of control strategies against drug-resistant *S.*  
99 *Typhi*.

100

101 **Results**

102 **XDR *S. Typhi* strains isolated from children at various developmental stages**

103 We isolated *S. Typhi* strains from 45 typhoid fever-suspected pediatric septicemia  
104 patients with 1-13 years of age (68.89% male and 31.11% female) who have visited the Fatima  
105 Memorial Hospital, Lahore, Punjab, Pakistan, between October 2019 to January 2020. Punjab is  
106 the most populous province approximately 1,044 km away from Hyderabad, Sindh, Pakistan,  
107 where the first XDR *S. Typhi* was reported (Figure 1A). Before samples were transferred to  
108 researchers, all *S. Typhi* samples were de-identified, number-based identification codes were  
109 assigned to samples (Table 1). The data were analyzed anonymously throughout the study.  
110 Positive blood culture bottles from the initial step using a fully automated culture and test system  
111 for patient blood specimens were sub-cultured on blood and MacConkey agar plates and  
112 incubated overnight at 37°C. Preliminary identification of the isolates was conducted according  
113 to colony morphology and culture characteristics, followed by polymerase chain reaction (PCR)  
114 and Sanger sequencing-based molecular determination (Figure 1B and C). These results indicate  
115 that all suspected patient specimens carried *S. Typhi* and all isolates are XDR since they are  
116 resistant to both first- and second-line antibiotics (Figure 1 and Table 1). XDR *S. Typhi* isolates  
117 exhibit similar minimum inhibitory concentration (MIC) values across 45 isolates with some  
118 variations, indicating that antibiotic resistance phenotypes do not correlate with age, sex, or  
119 hospital wards (Table 1).

120

121 **Molecular basis of resistance to first-line antibiotics among XDR *S. Typhi* isolates**

122 We hypothesized that resistance to first- and second-line antibiotics among XDR *S.*  
123 *Typhi* isolates is primarily due to the acquisition and/mutation of antibiotic-resistance-related

124 genes. To carry out a series of molecular characterization via PCR and/or PCR amplicon  
125 sequencing, we selected 18 *S. Typhi* samples based on sex, age, hospital wards, antibiotic-  
126 resistance profile, and MIC (Table 2). According to child development milestones defined by the  
127 Centers for Disease Control and Prevention (CDC), age groups were split into toddlers (ages 1 to  
128 2), preschoolers (ages 3 to 5), school-age children (ages 6 to 12), and adolescents (ages 13 to 18)  
129 (Figure 2A). To understand the molecular basis of the MDR phenotype resistant to all the first-  
130 line antibiotics with clinical relevance, we have designed primers specific to *catA1*, *blaTEM1*,  
131 *dhfr7*, and *sul1*, MDR-related genes encoded in the IncHI1 region (Table 3). Using these  
132 primers, we evaluated the presence of these MDR-related genes in 18 selected *S. Typhi* isolates  
133 via PCR analysis. All PCR reactions resulted in amplicons with expected size for specific genes  
134 except for two controls, antibiotic-susceptible *S. Typhi* ISP2825 (ISP) and a control PCR  
135 reaction mixture that did not contain any *S. Typhi* genomic DNA (N) (Figure 2B-D). Drug-  
136 susceptible *S. Typhi* ISP clinical isolate available in the laboratory was used as a control since all  
137 *S. Typhi* isolates from this cohort were XDR (Table 1). These results indicate that the MDR  
138 phenotype exhibited by these XDR *S. Typhi* isolates is most likely due to MDR-related genes  
139 encoded in the IncHI1 region.

140

#### 141 **Molecular basis of fluoroquinolone-resistance among XDR *S. Typhi* isolates**

142 The acquisition of an IncY region harboring *qnrS* and one or more point mutations on the  
143 genes *gyrA*, *gyrB*, *parC*, and/or *parE*, referred to as the quinolone resistance determining region  
144 (QRDR), have been correlated to fluoroquinolone-resistance among typhoidal *Salmonella*  
145 strains. A PCR primer set specific for *qnrS* was designed and used to investigate whether XDR *S.*  
146 *Typhi* isolates encode this fluoroquinolone-resistance-related gene. We found that, unlike

147 antibiotic-susceptible *S. Typhi* ISP2825, all XDR *S. Typhi* isolates tested encode *qnrS* (Figure  
148 3A). Fluoroquinolone-resistant *Salmonella* strains have been reported to carry point mutations in  
149 *gyrA*, *gyrB*, *parC*, and/or *parE*, which exhibits variations depending on geographical locations  
150 (10, 12-20) (Table 4). Specific primer sets for the known mutations on these four genes were  
151 designed for PCR and PCR amplicon sequencing (Table 3). Consistent with their essential roles  
152 in bacterial cell replication, both antibiotic-susceptible *S. Typhi* ISP2825 and all XDR *S. Typhi*  
153 isolates resulted in PCR products with expected size for the four topoisomerase genes (Figure  
154 3B-E). To determine whether XDR *S. Typhi* isolates resistant to fluoroquinolones have point  
155 mutations in these topoisomerase genes, we carried out Sanger sequencing of PCR amplicons.  
156 Consistent with the antibiotic-susceptible phenotype, *S. Typhi* ISP2825 carries wild-type  
157 topoisomerases. In contrast, we found that all the XDR *S. Typhi* isolates carry a mutant form of  
158 *gyrA* encoding for GyrA<sup>Ser83Phe</sup> (Figure 3F-G). GyrA<sup>Ser83Phe</sup> has been found most commonly  
159 among XDR *S. Typhi* identified from other endemic regions. We also found that these XDR *S.*  
160 *Typhi* isolates from pediatric septicemia patients encode wild-type *gyrB*, *parC*, and *parE* (Figure  
161 3G and Table 4).

162

### 163 **Molecular basis of third-generation cephalosporin-resistance among XDR *S. Typhi* isolates**

164 In addition to GyrA<sup>Ser83Phe</sup>, resistance to second-line antibiotics among XDR *S. Typhi* in  
165 Pakistan has been associated with an IncY region carrying the quinolone resistance gene *qnrS*  
166 (Figure 3A) and extended-spectrum  $\beta$ -lactamase resistance gene *blaCTX-M-15* (9, 38).  
167 Consistent with resistance to second-line antibiotics, fluoroquinolones and cephalosporins,  
168 among these XDR *S. Typhi* isolates from pediatric septicemia patients, we found the acquisition  
169 of *blaCTX-M-15* among all XDR *S. Typhi* tested (Figure 4). In contrast, antibiotic-susceptible *S.*



170 Typhi ISP2825 did not result in PCR amplicon for *blaCTX-M-15*, indicating the specificity of the  
171 primers used.

172

### 173 **Effects of efflux pumps on antibiotic resistance among XDR *S. Typhi* isolates**

174 XDR *S. Typhi* isolates from pediatric typhoid patients exhibit some variations in their  
175 antibiotic-resistance/susceptibility profiles across antibiotics tested in Table 1. These results led  
176 us to investigate drug efflux pumps in XDR *S. Typhi* isolates since drug efflux pump systems are  
177 associated with resistance/susceptibility to a wide range of antibiotics. The recent worrisome  
178 trend among some XDR *S. Typhi* includes a correlation between efflux pump mutations and  
179 azithromycin resistance. For instance, a point mutation(s) on the antibiotic-binding subunit AcrB  
180 of the tripartite AcrAB-TolC efflux pumps (e.g., R717Q or R717L) has recently been correlated  
181 to azithromycin-resistance among some *S. Typhi* and *S. Paratyphi A* clinical isolates (19, 25, 26).  
182 In addition, *Salmonella* encodes another tripartite efflux pump, ABC-type MacAB-TolC, and  
183 three other small efflux pumps, major facilitator superfamily (MFS), multidrug and toxin  
184 extrusion (MATE), and small multidrug resistance (SMR), spanning in the inner membrane of  
185 the bacteria and therefore need to cooperate with another tripartite efflux pump such as RND-  
186 type AcrAB-TolC in exporting antibiotics (24). In *Neisseria gonorrhoeae* that, like *S. Typhi*, is  
187 also a human-adapted gram-negative bacterial pathogen, point mutations on the promoter of  
188 *macA* of the tripartite MacAB-TolC efflux pump have been correlated to azithromycin-resistance  
189 (39).

190

191 To assess whether point mutations on tripartite efflux pumps have occurred among XDR  
192 *S. Typhi* isolates from pediatric patients, we have determined *macA* promoter and *acrB*

193 sequences via PCR and PCR amplicon sequencing using specific primer sets summarized in  
194 Table 3. We found that all XDR *S. Typhi* isolates tested carry wild-type -10 promoter sequence  
195 in the *macA* promoter and wild-type Arg at position 717 on the AcrB protein (Figure 5A-C).  
196 These results are consistent with azithromycin-susceptibility (2-8 µg/ml) among XDR *S. Typhi*  
197 isolates from our pediatric septicemia patient cohort (Figure 5C and Table 1).

198

199 The expression of drug-efflux pumps is tightly regulated. For instance, AcrR represses  
200 *acrAB* gene expression by binding to the operator and inhibiting the transcription of *acrAB*. In 3-  
201 dimensional protein structure, wild-type AcrR protein monomer forms nine  $\alpha$ -helices crucial for  
202 homodimer assembly, DNA-binding, and ligand-binding for its function in repressing *acrAB*  
203 expression (40, 41). Through whole-genome sequencing analysis of the latest NCBI RefSeq  
204 dataset of the fully assembled complete genome of *S. Typhi* (107 in total; Table 5), we found that  
205 two *S. Typhi* strains (RefSeq assembly accession IDs GCF\_001121865.2 and  
206 GCF\_900205275.1) carry a variant form of AcrR with 48 amino acid difference at the C-  
207 terminus (Figure 6A). Unlike the repressor AcrR variant, these two *S. Typhi* strains still carry  
208 wild-type RobA (NP\_463442.1) and MarA (WP\_000091194.1), activators for the *acrAB* gene  
209 expression, and wild-type AcrA (NP\_459471.1), AcrB (NP\_459470.1), and MacA  
210 (NP\_459918.1) (data not shown). These results led us to investigate whether our XDR *S. Typhi*  
211 isolates carry a variant form of AcrR. Consistent with our azithromycin-susceptibility data, we  
212 found that all the XDR *S. Typhi* isolates from our pediatric septicemia patient cohort carry wild-  
213 type AcrR (Figure 6B-C).

214

215 **Discussion**

216 XDR *S. Typhi* is more common among pediatric patients but the majority of antibiotic  
217 resistance studies available have been carried out using *S. Typhi* isolates from adult patients.  
218 Here, we characterized *S. Typhi* isolates from a medium size cohort of pediatric typhoid patients  
219 to determine antibiotic-resistance-related gene signatures associated with their drug-resistant  
220 profiles. This study provides a valuable overview of the recent (2019-2020) populations in the  
221 setting of Lahore, Pakistan, among a septic pediatric cohort and provides insights into the  
222 development of simple, cost-effective molecular detection methods with point-of-care testing  
223 potential.

224  
225 Biochemical method-mediated identification assisted by the streamlined automated  
226 system was further validated via molecular typing for typhoidal *Salmonella* specific gene  
227 sequences (42-44). Antibiotic resistance profiles were obtained through the automated test  
228 system that followed the CLSI 2018 guidelines. To determine the molecular basis of the  
229 antibiotic resistance profiles among these XDR *S. Typhi*, we have designed primer sets and  
230 optimized PCR reaction conditions for antibiotic resistance genes harbored in the IncHI1 (*catA1*,  
231 *blaTEM1*, *dhfr7*, and *sul1*) and IncY (*qnrS* and *blaCTX-M-15*) regions, contributing to  
232 resistance to front-line and second-line antibiotics, respectively. Overall findings across the XDR  
233 *S. Typhi* isolates for these antibiotic resistance genes are in agreement with our MIC results and  
234 other reports correlated to molecular determinants of MDR and XDR phenotypes among recent  
235 XDR *S. Typhi* isolates from adult typhoid patients (9).

236  
237 Besides *qnrS*, mutations on *gyrA*, *gyrB*, *parC*, and *parE* also contribute to  
238 fluoroquinolone-resistance, which exhibits more diverse patterns depending on geographical

239 locations. Our XDR *S. Typhi* isolates from pediatric patients in Northern Pakistan carry GyrA<sup>S83F</sup>  
240 across all samples tested, while the remaining genes were found to be wild-type (Figure 3 and  
241 Table 4). This result indicates that XDR *S. Typhi* circulating in this geographical location is  
242 different from the ones prevalent in other locations that exhibit different QRDR mutation  
243 signatures. Future investigations on XDR *S. Typhi* isolates from adult patients in the same  
244 geographical location would inform us about whether a divergent host adaptation process has  
245 occurred in pediatric and adult patients.

246

247         Macrolides such as azithromycin are considered the only remaining oral antibiotic option  
248 in treating XDR *S. Typhi* resistant to both front-line and second-line antibiotics. An additional  
249 treatment option against XDR *S. Typhi*, although requiring injection, are carbapenems such as  
250 imipenem and meropenem. Our XDR *S. Typhi* isolates from pediatric patients are susceptible to  
251 azithromycin, imipenem, and meropenem (Table 1). In contrast, 5% and 48% of recent *S. Typhi*  
252 isolates (n=81) from a mid-size adult cohort in Northern Punjab were resistant to azithromycin  
253 and meropenem, respectively (36), supporting the concept of a divergent host adaptation and/or  
254 transmission process in child and adult groups. These results also support a possibility that, with  
255 time, molecular determinants for azithromycin-resistance and meropenem-resistance would  
256 likely be adopted in nearly all *S. Typhi* circulating locally and globally.

257

258         Current analysis indicates that our XDR *S. Typhi* isolates from pediatric septicemia  
259 patients in Punjab do not carry molecular determinants that have been correlated to  
260 azithromycin-resistance in typhoidal *Salmonella*, *S. Typhi* and *S. Paratyphi A*, and another  
261 human-adapted Gram-negative pathogen *N. gonorrhoeae* (Figure 5). Besides wild-type AcrB and

262 wild-type -10 promoter sequence in the *macA* promoter across our XDR *S. Typhi* isolates, WGS  
263 analysis of the latest NCBI RefSeq dataset of the fully assembled complete genome of *S. Typhi*  
264 (107 in total), conducted as part of this study, indicates the emergence of *S. Typhi* strains  
265 carrying the frameshifted AcrR variant, the repressor of the *acrAB* efflux pump components.  
266 Although further investigations are required to understand the consequence of having the AcrR  
267 frameshifted variant in antibiotic-resistance, it is intriguing to hypothesize that the AcrR variant  
268 is less effective in repressing the expression of *acrAB*, therefore contributing to antibiotic-  
269 resistance such as azithromycin. We also found that those *S. Typhi* strains carrying the AcrR  
270 variant carry wild-type RobA and MarA, activators for the *acrAB* gene expression, and wild-type  
271 AcrAB, collectively supporting the hypothesis that possession of the AcrR frameshifted variant  
272 is an adaptation/evolution outcome, rather than a stochastic event outcome.

273

274         The emergence and spread of *S. Typhi* resistant to macrolides and carbapenems are a  
275 serious global health concern, deserving close surveillance for local and global spread. We  
276 envision that some of the methods detecting key molecular determinants for *S. Typhi* antibiotic  
277 resistance used in the current study could be developed as a surveillance strategy and point-of-  
278 care testing strategy. The detection and analysis methods for resistance to front-line and second-  
279 line antibiotics described in the study are straightforward. Besides efflux pump related molecular  
280 determinants described in the study, the future surveillance strategy could include additional  
281 molecular traits predicted to be associated with resistance to macrolides and carbapenems in *S.*  
282 *Typhi*. For instance, in *Enterobacteriaceae*, *erm* genes encoding for methylases to modify target  
283 sites, *ere* genes for esterase transferases, and *mph* genes for phosphor transferases are known to  
284 confer macrolide-resistance by altering the structure of antibiotics (45). Similarly, carbapenem

285 resistance in *S. Typhi* can be acquired by mutational events or gene acquisition via horizontal  
286 gene transfer, leading to the overexpression of efflux pumps that expel carbapenems and the  
287 acquisition of carbapenemases. The most effective carbapenemases known that hydrolyze  
288 carbapenem and spread across many bacterial pathogens are KPC, VIM, IMP, NDM and OXA-  
289 48 types (46).

290

291 In summary, this study informs the molecular basis of antibiotic-resistance among recent  
292 *S. Typhi* isolates from pediatric septicemia patients and provides insights into the development of  
293 molecular detection and control strategies for XDR *S. Typhi*.

294

## 295 **Materials & Methods**

### 296 **Ethics Statement**

297 Before initiating this research, ethical approval was obtained following the Declaration of  
298 Helsinki from the Institutional Review Board (IRB# FMH-03-2020-IRB-774-F), the Fatima  
299 Memorial Hospital Lahore. In addition, informed consent was obtained from a legal guardian of  
300 each study participant. Informed consent was read to the person in the language they understood  
301 and signed appropriately. They were willing to provide a sample and utilize the isolates for  
302 research. They were assured that the samples would be used solely for research purposes and that  
303 personal information would be kept confidential. Before samples were transferred to researchers,  
304 all XDR *S. Typhi* samples were de-identified, number-based identification codes were assigned  
305 to samples (Tables 1 and 2). The data were analyzed anonymously throughout the study.

306

### 307 ***S. Typhi* isolation from patient specimens and MIC determination**

308 The BACT/ALERT® 3D Microbial Detection System with PF/PF plus culture bottles  
309 (bioMérieux, France), an automated bacterial culture and antibiotic-resistance test system  
310 capable of incubating, agitating, and continuously monitoring aerobic and anaerobic media  
311 inoculated with patient specimens was used in this study. The samples were collected between  
312 October 2019 to January 2020. In brief, 1-4 mL blood samples of each septicemia suspected  
313 child based on their age and bodyweight were taken and placed in BacT/ALERT PF/PF plus  
314 bottles for up to 5 days. The bottles contained BacT/Alert FAN Plus media with Adsorbent  
315 Polymeric Beads (APB) that neutralized antimicrobials (47). Positive blood culture bottles were  
316 sub-cultured on blood and MacConkey agar plates and incubated overnight at 37°C aerobically.  
317 Preliminary identification of the isolates was conducted according to colony morphology and  
318 culture characteristics. MIC determinations were made using the automatic VITEK 2 compact  
319 system (bioMérieux, France) and antibiotics interpretation was carried out as per the clinical  
320 laboratory standards institute (CLSI) 2018 guidelines (<https://clsi.org>).

321

### 322 **XDR *S. Typhi* samples selection for detailed molecular characterization**

323 Of 45 XDR *S. Typhi* isolates, 18 isolates were selected for detailed molecular characterization  
324 based on their MIC results, gender, age, and hospital wards, representing all 45 XDR isolates  
325 (Tables 1 and 2).

326

### 327 **PCR-based detection of antibiotic-resistance-related genes among XDR *S. Typhi* isolates**

328 Bacterial genomic DNA was prepared using a DNeasy bacterial DNA extraction kit (QIAGEN)  
329 following the vendor's recommendation. The PCR primer sequences and reaction conditions  
330 used are summarized in Table 3. Green Taq DNA polymerase with provided buffers (GenScript)

331 was used for *pltB*, *blaTEM1*, *dhfr7*, *sull*, *catA1*, *parC*, *parE*, *blaCTXM15*, *macA*, *acrB*, and  
332 *acrR*. Phusion high fidelity DNA polymerase with the provided GC buffer (New England  
333 BioLabs) or Herculase II fusion DNA polymerase (Agilent) was used for *gyrA*, *gyrB*, and *qnrS*.  
334 PCR reaction steps were: pre-denaturation at 95°C for 3min, 34 cycles of denaturation at 95°C  
335 for 30 sec, annealing (see Table 3), and extension at 72°C for 1 kb/min (see Table 3 for amplicon  
336 size), and final extension at 72°C for 7 min using a C1000 Touch Thermal Cycle (BIO-RAD).  
337 PCR results were run on 1% agarose gels and imaged using an iBright CL1500 Imaging system  
338 (ThermoFisher Scientific).

339

#### 340 **Sanger sequencing of PCR amplicons**

341 When indicated, PCR amplicons were extracted from agarose gels for sequencing analysis by  
342 using the QIAEX II gel extraction system (QIAGEN, cat # 20051), followed by standard Sanger  
343 sequencing (The Cornell Institute of Biotechnology or Eton Bioscience Inc). The primer  
344 sequences used for Sanger sequencing are summarized in Table 3.

345

#### 346 **Whole-genome sequencing analysis for efflux pump-related genes**

347 The latest NCBI RefSeq dataset of the fully assembled complete genome of *S. Typhi* (107 in  
348 total; Table 5) was collected on Feb 26, 2021. The 107 complete whole-genome sequences were  
349 utilized to analyze the sequence variations for *acrR* (NP\_459472.1) using ‘General Feature  
350 Formats (gff)’ files with a bash script (`grep acrR *.gff | grep pseudo=true`). Two whole genome  
351 sequences (GCF\_001121865.2 and GCF\_900205275.1) that have an *acrR* variant were further  
352 analyzed with CLC Main Workbench 8.1.3 (QIAGEN) for multidrug efflux pump-related genes:



353 *macA* (NP\_459918.1), *acrA* (NP\_459471.1), *acrB* (NP\_459470.1), *marA* (WP\_000091194.1),  
354 and *robA* (NP\_463442.1).

355

### 356 **Acknowledgments**

357 This work was supported in part by NIH R01 AI137345, AI139625, and AI141514 to JS. The  
358 funders had no role in the study design, data collection and analysis, decision to publish, or  
359 preparation of the manuscript.

360

### 361 **Author contributions**

362 C.K. conducted experiments shown in Figs. 1-6 using genomic DNA received from M.U.Q., and  
363 prepared the manuscript draft. D.P.N. contributed to experiments shown in Figs. 1-6. G.Y.L.  
364 conducted WGS analysis for efflux pump-related genes shown in Fig. 6. R.S.K. contributed to  
365 antibiotic resistance-related gene sequence analysis. I.L. A.B. and Q.A. isolated XDR *S. Typhi*  
366 strains, conducted MIC determination experiments, and genomic DNA preparations. M.U.Q.  
367 supervised the isolation and antibiotic resistance phenotype characterization study. J.S.  
368 supervised the molecular characterization study using genomic DNA received, and prepared the  
369 manuscript with input from all authors.

370

### 371 **Declaration of interests**

372 The authors declare no competing interests.

373

### 374 **References**

375 1. Rudd KE, Johnson SC, Agesa KM, Shackelford KA, Tsoi D, Kievlan DR, et al. Global,

- 376 regional, and national sepsis incidence and mortality, 1990-2017: analysis for the Global Burden  
377 of Disease Study. *Lancet*. 2020;395(10219):200-11.
- 378 2. Wain J, Hendriksen RS, Mikoleit ML, Keddy KH, Ochiai RL. Typhoid fever. *Lancet*.  
379 2015;385(9973):1136-45.
- 380 3. Crump JA, Mintz ED. Global trends in typhoid and paratyphoid Fever. *Clin Infect Dis*.  
381 2010;50(2):241-6.
- 382 4. Wong VK, Baker S, Pickard DJ, Parkhill J, Page AJ, Feasey NA, et al. Phylogeographical  
383 analysis of the dominant multidrug-resistant H58 clade of *Salmonella* Typhi identifies inter- and  
384 intracontinental transmission events. *Nat Genet*. 2015;47(6):632-9.
- 385 5. Baker S, Holt KE, Clements AC, Karkey A, Arjyal A, Boni MF, et al. Combined high-  
386 resolution genotyping and geospatial analysis reveals modes of endemic urban typhoid fever  
387 transmission. *Open Biol*. 2011;1(2):110008.
- 388 6. Holt KE, Dolecek C, Chau TT, Duy PT, La TT, Hoang NV, et al. Temporal fluctuation of  
389 multidrug resistant salmonella typhi haplotypes in the mekong river delta region of Vietnam. *PLoS*  
390 *Negl Trop Dis*. 2011;5(1):e929.
- 391 7. Yan M, Li X, Liao Q, Li F, Zhang J, Kan B. The emergence and outbreak of multidrug-  
392 resistant typhoid fever in China. *Emerg Microbes Infect*. 2016;5(6):e62.
- 393 8. Ingle DJ, Nair S, Hartman H, Ashton PM, Dyson ZA, Day M, et al. Informal genomic  
394 surveillance of regional distribution of *Salmonella* Typhi genotypes and antimicrobial resistance  
395 via returning travellers. *PLoS Negl Trop Dis*. 2019;13(9):e0007620.
- 396 9. Klemm EJ, Shakoor S, Page AJ, Qamar FN, Judge K, Saeed DK, et al. Emergence of an  
397 Extensively Drug-Resistant *Salmonella enterica* Serovar Typhi Clone Harboring a Promiscuous  
398 Plasmid Encoding Resistance to Fluoroquinolones and Third-Generation Cephalosporins. *MBio*.

- 399 2018;9(1):e00105-18.
- 400 10. Parkhill J, Dougan G, James KD, Thomson NR, Pickard D, Wain J, et al. Complete genome  
401 sequence of a multiple drug resistant *Salmonella enterica* serovar Typhi CT18. *Nature*.  
402 2001;413(6858):848-52.
- 403 11. Dyson ZA, Klemm EJ, Palmer S, Dougan G. Antibiotic Resistance and Typhoid. *Clin*  
404 *Infect Dis*. 2019;68(Suppl 2):S165-s70.
- 405 12. Dutta S. Fitness gains hamper efforts to tackle drug resistance. *Elife*. 2013;2:e01809.
- 406 13. Veeraraghavan B, Anandan S, Muthuirulandi Sethuvel DP, Puratchiveeran N, Walia K,  
407 Devanga Ragupathi NK. Molecular Characterization of Intermediate Susceptible Typhoidal  
408 *Salmonella* to Ciprofloxacin, and its Impact. *Mol Diagn Ther*. 2016;20(3):213-9.
- 409 14. Capoor MR, Nair D, Walia NS, Routela RS, Grover SS, Deb M, et al. Molecular analysis  
410 of high-level ciprofloxacin resistance in *Salmonella enterica* serovar Typhi and *S. Paratyphi A*:  
411 need to expand the QRDR region? *Epidemiol Infect*. 2009;137(6):871-8.
- 412 15. Gopal M, Elumalai S, Arumugam S, Durairajpandian V, Kannan MA, Selvam E, et al.  
413 GyrA ser83 and ParC trp106 Mutations in *Salmonella enterica* Serovar Typhi Isolated from  
414 Typhoid Fever Patients in Tertiary Care Hospital. *J Clin Diagn Res*. 2016;10(7):Dc14-8.
- 415 16. Ling JM, Chan EW, Lam AW, Cheng AF. Mutations in topoisomerase genes of  
416 fluoroquinolone-resistant salmonellae in Hong Kong. *Antimicrob Agents Chemother*.  
417 2003;47(11):3567-73.
- 418 17. Accou-Demartin M, Gaborieau V, Song Y, Roumagnac P, Marchou B, Achtman M, et al.  
419 *Salmonella enterica* Serotype Typhi with nonclassical quinolone resistance phenotype. *Emerg*  
420 *Infect Dis*. 2011;17(6):1091-4.
- 421 18. Qian H, Cheng S, Liu G, Tan Z, Dong C, Bao J, et al. Discovery of seven novel mutations

- 422 of gyrB, parC and parE in Salmonella Typhi and Paratyphi strains from Jiangsu Province of China.  
423 Sci Rep. 2020;10(1):7359.
- 424 19. Cheng MW, Lee CM, Wang NY, Wu AY, Lin CC, Weng LC, et al. Clinical characteristics  
425 in adult patients with Salmonella bacteremia and analysis of ciprofloxacin-nonsusceptible isolates.  
426 J Microbiol Immunol Infect. 2015;48(6):692-8.
- 427 20. Matono T, Morita M, Yahara K, Lee KI, Izumiya H, Kaku M, et al. Emergence of  
428 Resistance Mutations in Salmonella enterica Serovar Typhi Against Fluoroquinolones. Open  
429 Forum Infect Dis. 2017;4(4):ofx230.
- 430 21. Vashist J, Vishvanath, Kapoor R, Kapil A, Yennamalli R, Subbarao N, et al. Interaction of  
431 nalidixic acid and ciprofloxacin with wild type and mutated quinolone-resistance-determining  
432 region of DNA gyrase A. Indian J Biochem Biophys. 2009;46(2):147-53.
- 433 22. Chiou CS, Lauderdale TL, Phung DC, Watanabe H, Kuo JC, Wang PJ, et al. Antimicrobial  
434 resistance in Salmonella enterica Serovar Typhi isolates from Bangladesh, Indonesia, Taiwan, and  
435 Vietnam. Antimicrob Agents Chemother. 2014;58(11):6501-7.
- 436 23. Buckner MM, Blair JM, La Ragione RM, Newcombe J, Dwyer DJ, Ivens A, et al. Beyond  
437 Antimicrobial Resistance: Evidence for a Distinct Role of the AcrD Efflux Pump in Salmonella  
438 Biology. mBio. 2016;7(6):e01916.
- 439 24. Du D, Wang-Kan X, Neuberger A, van Veen HW, Pos KM, Piddock LJV, et al. Multidrug  
440 efflux pumps: structure, function and regulation. Nat Rev Microbiol. 2018;16(9):523-39.
- 441 25. Hooda Y, Sajib MSI, Rahman H, Luby SP, Bondy-Denomy J, Santosham M, et al.  
442 Molecular mechanism of azithromycin resistance among typhoidal Salmonella strains in  
443 Bangladesh identified through passive pediatric surveillance. PLoS Negl Trop Dis.  
444 2019;13(11):e0007868.

- 445 26. Sajib MSI, Tanmoy AM, Hooda Y, Rahman H, Andrews JR, Garrett DO, et al. Tracking  
446 the Emergence of Azithromycin Resistance in Multiple Genotypes of Typhoidal Salmonella. *mBio*.  
447 2021;12(1):e03481-20.
- 448 27. Feasey NA, Gaskell K, Wong V, Msefula C, Selemani G, Kumwenda S, et al. Rapid  
449 emergence of multidrug resistant, H58-lineage *Salmonella typhi* in Blantyre, Malawi. *PLoS Negl*  
450 *Trop Dis*. 2015;9(4):e0003748.
- 451 28. Qamar FN, Yousafzai MT, Sultana S, Baig A, Shakoor S, Hirani F, et al. A Retrospective  
452 Study of Laboratory-Based Enteric Fever Surveillance, Pakistan, 2012-2014. *J Infect Dis*.  
453 2018;218(suppl\_4):S201-S5.
- 454 29. Levine MM, Simon R. The Gathering Storm: Is Untreatable Typhoid Fever on the Way?  
455 *mBio*. 2018;9(2):e00482-18.
- 456 30. Yang YA, Chong A, Song J. Why Is Eradicating Typhoid Fever So Challenging:  
457 Implications for Vaccine and Therapeutic Design. *Vaccines (Basel)*. 2018;6(3):E45.
- 458 31. WHO. Typhoid vaccines: WHO position paper, March 2018 - Recommendations. *Vaccine*.  
459 2018.
- 460 32. Voysey M, Pollard AJ. Seroefficacy of Vi Polysaccharide-Tetanus Toxoid Typhoid  
461 Conjugate Vaccine (Typbar TCV). *Clin Infect Dis*. 2018;67(1):18-24.
- 462 33. Wain J, House D, Zafar A, Baker S, Nair S, Kidgell C, et al. Vi antigen expression in  
463 *Salmonella enterica* serovar Typhi clinical isolates from Pakistan. *J Clin Microbiol*.  
464 2005;43(3):1158-65.
- 465 34. Ahsan S, Rahman S. Azithromycin Resistance in Clinical Isolates of *Salmonella enterica*  
466 Serovars Typhi and Paratyphi in Bangladesh. *Microb Drug Resist*. 2019;25(1):8-13.
- 467 35. Wattal C, Goel N. Pediatric Blood Cultures and Antibiotic Resistance: An Overview. *Indian*

- 468 J Pediatr. 2020;87(2):125-31.
- 469 36. Ali Shah SA, Nadeem M, Syed SA, Fatima Abidi ST, Khan N, Bano N. Antimicrobial  
470 Sensitivity Pattern of Salmonella Typhi: Emergence of Resistant Strains. Cureus.  
471 2020;12(11):e11778.
- 472 37. Fernández J, Guerra B, Rodicio MR. Resistance to Carbapenems in Non-Typhoidal  
473 Salmonella enterica Serovars from Humans, Animals and Food. Vet Sci. 2018;5(2):40.
- 474 38. Rasheed F, Saeed M, Alikhan NF, Baker D, Khurshid M, Ainsworth EV, et al. Emergence  
475 of Resistance to Fluoroquinolones and Third-Generation Cephalosporins in Salmonella Typhi in  
476 Lahore, Pakistan. Microorganisms. 2020;8(9).
- 477 39. Rouquette-Loughlin CE, Balthazar JT, Shafer WM. Characterization of the MacA–MacB  
478 efflux system in Neisseria gonorrhoeae. Journal of Antimicrobial Chemotherapy. 2005;56(5):856-  
479 60.
- 480 40. Kang SM, Kim DH, Jin C, Ahn HC, Lee BJ. The crystal structure of AcrR from  
481 Mycobacterium tuberculosis reveals a one-component transcriptional regulation mechanism.  
482 FEBS Open Bio. 2019;9(10):1713-25.
- 483 41. Su CC, Rutherford DJ, Yu EW. Characterization of the multidrug efflux regulator AcrR  
484 from Escherichia coli. Biochem Biophys Res Commun. 2007;361(1):85-90.
- 485 42. Neupane DP, Dulal HP, Song J. Enteric Fever Diagnosis: Current Challenges and Future  
486 Directions. Pathogens. 2021;10(4):410.
- 487 43. Lee S, Yang YA, Milano SK, Nguyen T, Ahn C, Sim JH, et al. Salmonella Typhoid Toxin  
488 PltB Subunit and Its Non-typhoidal Salmonella Ortholog Confer Differential Host Adaptation and  
489 Virulence. Cell Host Microbe. 2020;27(6):937-49.
- 490 44. Ahn C, Yang Y-A, Neupane DP, Nguyen T, Richards AF, Sim JH, et al. Mechanisms of

- 491 typhoid toxin neutralization by antibodies targeting glycan receptor binding and nuclease subunits.  
492 *iScience*. 2021;24(5):102454.
- 493 45. Taitt CR, Leski TA, Prouty MG, Ford GW, Heang V, House BL, et al. Tracking  
494 Antimicrobial Resistance Determinants in Diarrheal Pathogens: A Cross-Institutional Pilot Study.  
495 *Int J Mol Sci*. 2020;21(16).
- 496 46. Poirel L, Potron A, Nordmann P. OXA-48-like carbapenemases: the phantom menace. *J*  
497 *Antimicrob Chemother*. 2012;67(7):1597-606.
- 498 47. Mitteregger D, Barousch W, Nehr M, Kundi M, Zeitlinger M, Makristathis A, et al.  
499 Neutralization of antimicrobial substances in new BacT/Alert FA and FN Plus blood culture bottles.  
500 *J Clin Microbiol*. 2013;51(5):1534-40.
- 501 48. Baker S, Duy PT, Nga TV, Dung TT, Phat VV, Chau TT, et al. Fitness benefits in  
502 fluoroquinolone-resistant *Salmonella Typhi* in the absence of antimicrobial pressure. *Elife*.  
503 2013;2:e01229.

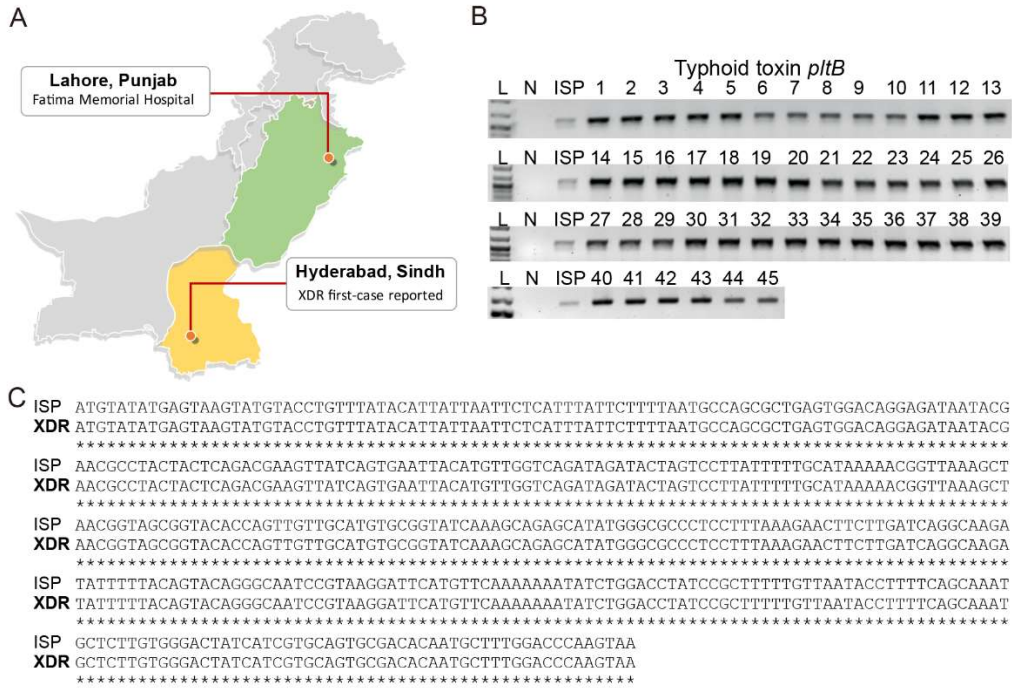

1  
2 **Figure 1. XDR *S. Typhi* strains isolated from children ages 1-13 years old. A**, Cartoon showing the  
3 geographical location that XDR *S. Typhi* characterized in this study was isolated compared to the location  
4 that the first case of XDR *S. Typhi* was reported. **B**, PCR reactions of 45 XDR isolates for typhoid toxin  
5 *ptb*. **C**, *ptb* sequences from all 45 XDR isolates (XDR, one representative is shown) were identical to  
6 typhoid toxin *ptb* sequence of *S. Typhi* ISP2825 (ISP). ISP, antibiotic-susceptible *S. Typhi* ISP2825. N,  
7 negative control containing all PCR components except for *S. Typhi* genomic DNA. See Table 1 for  
8 sample information.



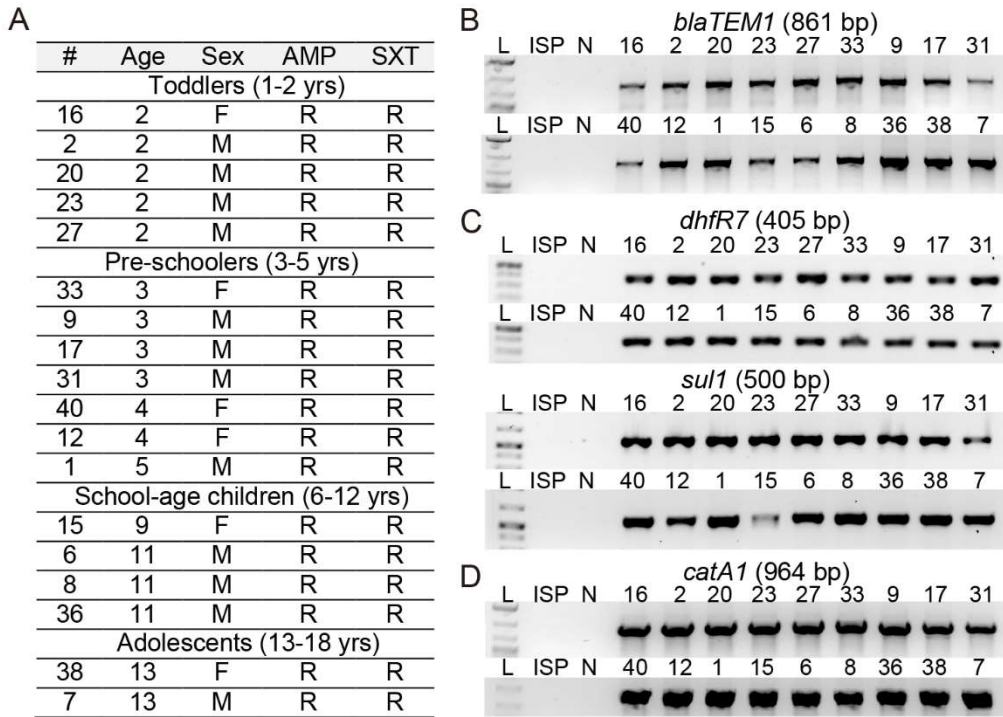

9  
10  
11  
12  
13  
14

**Figure 2. Molecular basis of resistance to first-line antibiotics among XDR *S. Typhi* isolates. A,** Sample information and antibiotic resistance profiles of select of XDR *S. Typhi* isolates for molecular characterization. See Table 2 for details. **B,** PCR reactions for *blaTEM1*. **C,** PCR reactions for *dhfR7* and *sul1*. **D,** PCR reactions for *catA1*. ISP, antibiotic-susceptible *S. Typhi* ISP2825. N, negative control containing all PCR components except for *S. Typhi* genomic DNA. See Table 3 for details.

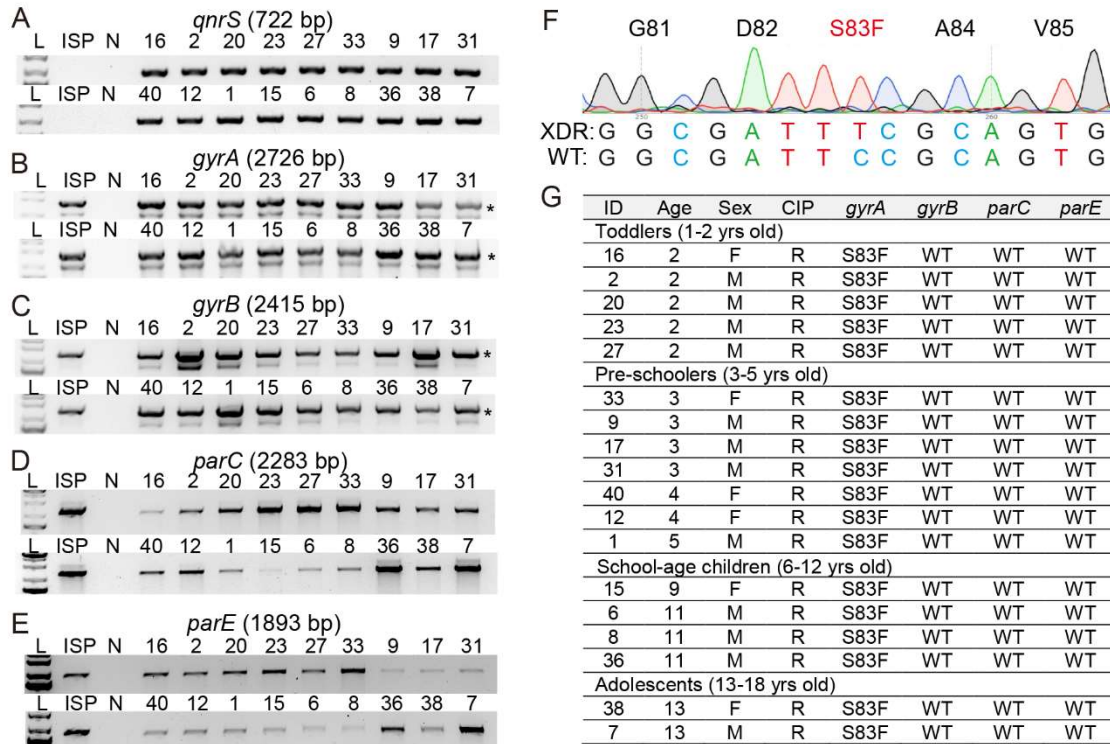

15

16 **Figure 3. Molecular basis of fluoroquinolone-resistance among XDR *S. Typhi* isolates. A-E**, PCR  
 17 reactions for *qnrS* (A), *gyrA* (B), *gyrB* (C), *parC* (D), and *parE* (E). See Table 3 for details. ISP, antibiotic-  
 18 susceptible *S. Typhi* ISP2825. N, negative control containing all PCR components except for *S. Typhi*  
 19 genomic DNA. \*, PCR amplicons specific to *gyrA* in B and *gyrB* in C. F, Representative sequencing  
 20 chromatogram showing GyrA S83F mutation. G, Summary of PCR amplicon sequencing analysis for  
 21 *gyrA*, *gyrB*, *parC*, and *parE*. See Table 4 for additional information. WT, wild type for the known  
 22 mutations.

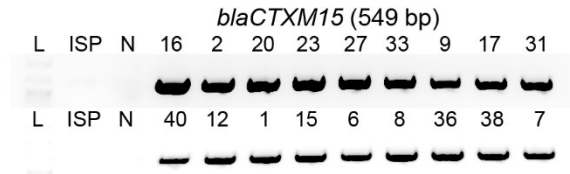

23

24 **Figure 4. Molecular basis of third-generation cephalosporin-resistance among XDR *S. Typhi***  
25 **isolates.** PCR reactions for *blaCTXM15*. ISP, antibiotic-susceptible *S. Typhi* ISP2825. N, negative control  
26 containing all PCR components except for *S. Typhi* genomic DNA.

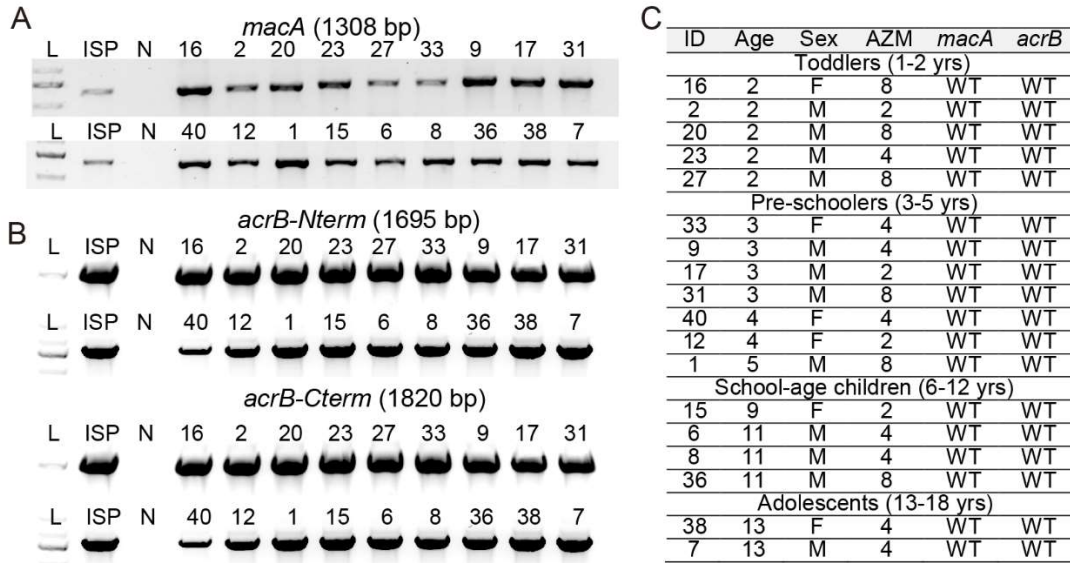

27

28 **Figure 5. *macA* and *acrB* sequence analysis among XDR *S. Typhi* isolates. A-B, PCR reactions for**  
 29 ***macA* (A) and *acrB* (B). *acrB* was split into two pieces for more productive PCR reaction outcomes (*acrB*-**  
 30 **Nterm and *acrB*-Cterm). ISP, antibiotic-susceptible *S. Typhi* ISP2825. N, negative control containing all**  
 31 **PCR components except for *S. Typhi* genomic DNA. See Table 3 for details. C, Summary of PCR**  
 32 **amplicon sequencing analysis for *macA* and *acrB*. WT, wild type for the known mutations.**

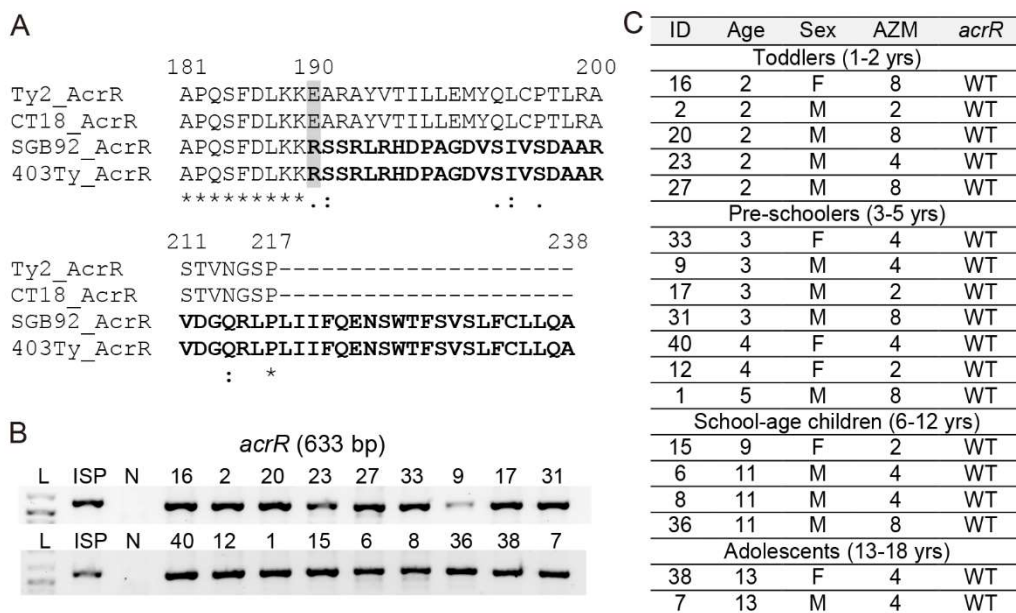

33

34 **Figure 6. AcrR sequence analysis among XDR S. Typhi isolates.** **A**, AcrR amino acid sequence  
35 comparison analysis of the latest RefSeq dataset of the fully assembled complete genome of *S. Typhi*  
36 (107 in total) collected from NCBI as of Feb 26, 2021. Ty2, *S. Typhi* Ty2 (RefSeq assembly accession:  
37 GCF\_000007545.1, assembly name: ASM754v1, strain: Ty2, submitter: University of Wisconsin). CT18,  
38 *S. Typhi* CT18 (RefSeq assembly accession: GCF\_000195995.1, assembly name: ASM19599v1, strain:  
39 CT18, submitter: Sanger Institute). SGB92, *S. Typhi* SGB92 (RefSeq assembly accession:  
40 GCF\_001121865.2, assembly name: 404Ty, strain name: SGB92, submitter: Wellcome Sanger Institute).  
41 403Ty, *S. Typhi* 403Ty-sc-1979084 (RefSeq assembly accession: GCF\_900205275.1, assembly name:  
42 403Ty, isolate: 403Ty-sc-1979084, submitter: Wellcome Sanger Institute). See Table 5 for details. **B**,  
43 PCR reactions for *acrR*. ISP, antibiotic-susceptible *S. Typhi* ISP2825. N, negative control containing all  
44 PCR components except for *S. Typhi* genomic DNA. **C**, Summary of PCR amplicon sequencing analysis  
45 for *acrR*. WT, wild type for the known mutations.

46 **Table 1. The minimum inhibitory concentration (MIC) results (µg/ml) of all samples used in this**  
 47 **study, related to Fig. 1.**

| #  | Age<br>* | Sex | Wards<br>** | AMP<br>*** | SXT   | CIP | CTX | CRO | PIP/TZB     | AMC    | AZM | IPM  | MEM  |
|----|----------|-----|-------------|------------|-------|-----|-----|-----|-------------|--------|-----|------|------|
| 1  | 5        | M   | E           | ≥32        | ≥4/76 | ≥64 | 8   | 32  | 32/4 - 64/4 | ≥32/16 | 8   | 0.25 | 0.25 |
| 2  | 2        | M   | I           | ≥32        | ≥4/76 | 32  | 8   | ≥64 | 4/4-128/4   | 8/4    | 2   | 0.5  | 0.25 |
| 3  | 4        | F   | E           | ≥32        | ≥4/76 | ≥64 | ≥64 | 32  | 32/4 - 64/4 | 16/8   | 8   | 0.5  | 0.25 |
| 4  | 10       | M   | I           | ≥32        | ≥4/76 | 32  | 32  | 8   | 32/4 - 64/4 | 16/8   | 4   | 0.5  | 0.25 |
| 5  | 11       | M   | M           | ≥32        | ≥4/76 | 8   | ≥64 | ≥64 | 32/4 - 64/4 | ≥32/16 | 4   | 0.25 | 0.5  |
| 6  | 11       | M   | C           | ≥32        | ≥4/76 | ≥64 | 32  | ≥64 | 4/4-128/4   | 8/4    | 4   | 0.25 | 0.5  |
| 7  | 13       | M   | E           | ≥32        | ≥4/76 | ≥64 | ≥64 | 32  | 4/4-128/4   | 4/2    | 4   | 0.25 | 0.5  |
| 8  | 11       | M   | E           | ≥32        | ≥4/76 | 32  | ≥64 | ≥64 | ≥128/4      | ≥32/16 | 4   | 0.5  | 0.5  |
| 9  | 3        | M   | C           | ≥32        | ≥4/76 | 8   | ≥64 | ≥64 | 4/4-128/4   | 4/2    | 4   | 0.25 | 0.5  |
| 10 | 4        | M   | E           | ≥32        | ≥4/76 | ≥64 | 32  | ≥64 | ≥128/4      | ≥32/16 | 4   | 0.5  | 0.5  |
| 11 | 4        | F   | G           | ≥32        | ≥4/76 | ≥64 | 32  | 32  | ≥128/4      | ≥32/16 | 2   | 0.5  | 0.5  |
| 12 | 4        | F   | E           | ≥32        | ≥4/76 | ≥64 | 8   | ≥64 | 32/4 - 64/4 | 16/8   | 2   | 0.5  | 0.25 |
| 13 | 5        | M   | O           | ≥32        | ≥4/76 | 32  | ≥64 | 32  | ≥128/4      | 16/8   | 2   | 0.5  | 0.5  |
| 14 | 4        | M   | I           | ≥32        | ≥4/76 | ≥64 | ≥64 | ≥64 | ≥128/4      | 16/8   | 8   | 0.5  | 0.5  |
| 15 | 9        | F   | O           | ≥32        | ≥4/76 | 32  | 32  | ≥64 | 4/4-128/4   | 8/4    | 2   | 0.5  | 0.5  |
| 16 | 2        | F   | O           | ≥32        | ≥4/76 | ≥64 | ≥64 | ≥64 | ≥128/4      | 16/8   | 8   | 0.5  | 0.25 |
| 17 | 3        | M   | E           | ≥32        | ≥4/76 | ≥64 | ≥64 | 32  | 32/4 - 64/4 | ≥32/16 | 2   | 0.25 | 0.25 |
| 18 | 6        | M   | C           | ≥32        | ≥4/76 | ≥64 | ≥64 | 32  | 32/4 - 64/4 | 16/8   | 8   | 0.25 | 0.25 |
| 19 | 8        | M   | C           | ≥32        | ≥4/76 | ≥64 | ≥64 | ≥64 | ≥128/4      | 16/8   | 8   | 0.25 | 0.25 |
| 20 | 2        | M   | W           | ≥32        | ≥4/76 | 32  | ≥64 | 32  | 32/4 - 64/4 | 16/8   | 8   | 0.25 | 0.25 |
| 21 | 6        | M   | W           | ≥32        | ≥4/76 | ≥64 | 32  | ≥64 | ≥128/4      | ≥32/16 | 2   | 0.25 | 0.25 |
| 22 | 5        | M   | E           | ≥32        | ≥4/76 | ≥64 | ≥64 | 32  | 32/4 - 64/4 | ≥32/16 | 8   | 0.5  | 0.25 |
| 23 | 2        | M   | I           | ≥32        | ≥4/76 | ≥64 | ≥64 | ≥64 | 32/4 - 64/4 | 16/8   | 4   | 0.5  | 0.5  |
| 24 | 7        | M   | MI          | ≥32        | ≥4/76 | ≥64 | 8   | 32  | 32/4 - 64/4 | ≥32/16 | 8   | 0.5  | 0.5  |
| 25 | 5        | M   | E           | ≥32        | ≥4/76 | 8   | ≥64 | ≥64 | ≥128/4      | 16/8   | 4   | 0.25 | 0.25 |
| 26 | 11       | M   | E           | ≥32        | ≥4/76 | ≥64 | ≥64 | 32  | ≥128/4      | 16/8   | 8   | 0.25 | 0.25 |
| 27 | 2        | M   | E           | ≥32        | ≥4/76 | ≥64 | ≥64 | 32  | ≥128/4      | ≥32/16 | 8   | 0.25 | 0.5  |
| 28 | 7        | M   | W           | ≥32        | ≥4/76 | ≥64 | 32  | ≥64 | ≥128/4      | 16/8   | 4   | 0.5  | 0.5  |
| 29 | 2        | F   | W           | ≥32        | ≥4/76 | ≥64 | 32  | 8   | 4/4-128/4   | 8/4    | 4   | 0.5  | 0.25 |
| 30 | 6        | M   | E           | ≥32        | ≥4/76 | ≥64 | ≥64 | ≥64 | 32/4 - 64/4 | 16/8   | 4   | 0.5  | 0.25 |
| 31 | 3        | M   | C           | ≥32        | ≥4/76 | ≥64 | ≥64 | 8   | 32/4 - 64/4 | ≥32/16 | 8   | 0.25 | 0.25 |
| 32 | 5        | M   | E           | ≥32        | ≥4/76 | ≥64 | 32  | 32  | 32/4 - 64/4 | 16/8   | 4   | 0.25 | 0.25 |
| 33 | 3        | F   | E           | ≥32        | ≥4/76 | ≥64 | ≥64 | ≥64 | 32/4 - 64/4 | 16/8   | 4   | 0.25 | 0.25 |
| 34 | 6        | M   | E           | ≥32        | ≥4/76 | 32  | ≥64 | ≥64 | 32/4 - 64/4 | ≥32/16 | 4   | 0.5  | 0.5  |
| 35 | 6        | F   | O           | ≥32        | ≥4/76 | ≥64 | ≥64 | ≥64 | 32/4 - 64/4 | 8/4    | 4   | 0.25 | 0.5  |
| 36 | 11       | M   | C           | ≥32        | ≥4/76 | ≥64 | ≥64 | 8   | ≥128/4      | 8/4    | 8   | 0.25 | 0.5  |
| 37 | 2        | F   | W           | ≥32        | ≥4/76 | 32  | 32  | ≥64 | 4/4-128/4   | 8/4    | 4   | 0.5  | 0.5  |
| 38 | 13       | F   | F           | ≥32        | ≥4/76 | 32  | ≥64 | ≥64 | 32/4 - 64/4 | 8/4    | 4   | 0.5  | 0.5  |
| 39 | 10       | F   | E           | ≥32        | ≥4/76 | ≥64 | ≥64 | 8   | 32/4 - 64/4 | 8/4    | 8   | 0.5  | 0.25 |

|    |   |   |   |     |       |     |     |     |             |        |   |      |      |
|----|---|---|---|-----|-------|-----|-----|-----|-------------|--------|---|------|------|
| 40 | 4 | F | O | ≥32 | ≥4/76 | 8   | ≥64 | ≥64 | 32/4 - 64/4 | 8/4    | 4 | 0.25 | 0.25 |
| 41 | 5 | M | O | ≥32 | ≥4/76 | ≥64 | ≥64 | 32  | ≥128/4      | ≥32/16 | 8 | 0.25 | 0.5  |
| 42 | 5 | M | E | ≥32 | ≥4/76 | ≥64 | 32  | ≥64 | 32/4 - 64/4 | 16/8   | 4 | 0.25 | 0.25 |
| 43 | 8 | F | E | ≥32 | ≥4/76 | 32  | 32  | ≥64 | ≥128/4      | 8/4    | 4 | 0.25 | 0.5  |
| 44 | 2 | F | O | ≥32 | ≥4/76 | ≥64 | ≥64 | ≥64 | 32/4 - 64/4 | ≥32/16 | 4 | 0.5  | 0.25 |
| 45 | 1 | M | E | ≥32 | ≥4/76 | ≥64 | 8   | 32  | 32/4 - 64/4 | ≥32/16 | 4 | 0.25 | 0.25 |

48 \*, Age in years.

49 \*\*, E, Peads Emergency; I, PAED-ICU; M, Male Medical; C, Clinical Laboratory; G, General OPD; O,  
50 Peads Medical OPD; W, Pead Medical Ward; MI, Pead Medical ICU; F, FMH-executive clinic.

51 \*\*\*, Antibiotic acronym: AMP, ampicillin, SXT, trimethoprim-sulfamethoxazole, CIP, ciprofloxacin, CTX,  
52 cefotaxime, CRO, ceftriaxone, AZM, azithromycin, PIP, piperacillin, TZB, tazobactam, AMC, amoxicillin/  
53 clavulanic acid, IPM, imipenem, MEM, meropenem.

54 **Table 2. Select of samples for molecular characterization, related to Figs 2-6.**

| Lab No                         | Age (Yr) | Sex | AMP | SXT | CIP | CTX | CRO | PIP/TZB | AMC/CLA | AZM | IPM | MEM |
|--------------------------------|----------|-----|-----|-----|-----|-----|-----|---------|---------|-----|-----|-----|
|                                |          |     | MDR |     | XDR |     |     |         |         |     |     |     |
| Toddlers (1-2 yrs)             |          |     |     |     |     |     |     |         |         |     |     |     |
| 16                             | 2        | F   | R   | R   | R   | R   | R   | I       | I       | S   | S   | S   |
| 2                              | 2        | M   | R   | R   | R   | R   | R   | S       | S       | S   | S   | S   |
| 20                             | 2        | M   | R   | R   | R   | R   | R   | I       | I       | S   | S   | S   |
| 23                             | 2        | M   | R   | R   | R   | R   | R   | I       | I       | S   | S   | S   |
| 27                             | 2        | M   | R   | R   | R   | R   | R   | I       | I       | S   | S   | S   |
| Pre-schoolers (3-5 yrs)        |          |     |     |     |     |     |     |         |         |     |     |     |
| 33                             | 3        | F   | R   | R   | R   | R   | R   | I       | I       | S   | S   | S   |
| 9                              | 3        | M   | R   | R   | R   | R   | R   | S       | S       | S   | S   | S   |
| 17                             | 3        | M   | R   | R   | R   | R   | R   | I       | I       | S   | S   | S   |
| 31                             | 3        | M   | R   | R   | R   | R   | R   | I       | I       | S   | S   | S   |
| 40                             | 4        | F   | R   | R   | R   | R   | R   | I       | S       | S   | S   | S   |
| 12                             | 4        | F   | R   | R   | R   | R   | R   | I       | I       | S   | S   | S   |
| 1                              | 5        | M   | R   | R   | R   | R   | R   | I       | I       | S   | S   | S   |
| School-age children (6-12 yrs) |          |     |     |     |     |     |     |         |         |     |     |     |
| 15                             | 9        | F   | R   | R   | R   | R   | R   | S       | S       | S   | S   | S   |
| 6                              | 11       | M   | R   | R   | R   | R   | R   | S       | S       | S   | S   | S   |
| 8                              | 11       | M   | R   | R   | R   | R   | R   | I       | I       | S   | S   | S   |
| 36                             | 11       | M   | R   | R   | R   | R   | R   | I       | S       | S   | S   | S   |
| Adolescents (13-18 yrs)        |          |     |     |     |     |     |     |         |         |     |     |     |
| 38                             | 13       | F   | R   | R   | R   | R   | R   | I       | S       | S   | S   | S   |
| 7                              | 13       | M   | R   | R   | R   | R   | R   | S       | S       | S   | S   | S   |

55



56 **Table 3. PCR and sequencing primers and PCR conditions used in this study, related to Methods.**

| Genes            | Primers    | Primer sequences (5'-3') | Annealing temp. | Extension time (min) | Amplicon size (bp) |
|------------------|------------|--------------------------|-----------------|----------------------|--------------------|
| <i>pltB</i>      | Forward    | TAAACCATGATAGACTGG       | 55°C            | 0.5                  | 657                |
|                  | Reverse    | GAAAGTTACGGTTATACC       |                 |                      |                    |
|                  | Sequencing | TAAACCATGATAGACTGG       |                 |                      |                    |
| <i>blaTEM1</i>   | Forward    | AACCCTGGTAAATGCTTC       | 55°C            | 1                    | 861                |
|                  | Reverse    | GTATATATGAGTAAACTTGG     |                 |                      |                    |
| <i>catA1</i>     | Forward    | GAAGATCACTTCGCAGAATAA    | 45°C            | 1                    | 964                |
|                  | Reverse    | CAGCAATAGACATAAGCG       |                 |                      |                    |
| <i>dhfR7</i>     | Forward    | GCAACGTCAGAAAATGGC       | 60°C            | 0.5                  | 405                |
|                  | Reverse    | AAACTGCTCAAAAAGGAAATTGA  |                 |                      |                    |
| <i>sul1</i>      | Forward    | GTATTGCGCCGCTCTTAGAC     | 60°C            | 0.5                  | 500                |
|                  | Reverse    | AGGGTTTCCGAGAAGGTGAT     |                 |                      |                    |
| <i>qnrS</i>      | Forward    | TATAATGGTAGTCTAGCCC      | 52°C            | 1                    | 722                |
|                  | Reverse    | GATGTGTGATTTTAAACG       |                 |                      |                    |
| <i>gyrA</i>      | Forward    | CTTTGAATCCGGGATACAG      | 55°C            | 2                    | 2726               |
|                  | Reverse    | CCTTTTTCTTGTCTATGGAA     |                 |                      |                    |
|                  | Sequencing | CTTTGAATCCGGGATACAG      |                 |                      |                    |
| <i>gyrB</i>      | Forward    | GAAAAGGGTAAATAACGG       | 55°C            | 2                    | 2415               |
|                  | Reverse    | CATCATGATGCCCTGGCCAG     |                 |                      |                    |
|                  | Sequencing | GAATAAAACGCCGATCCAC      |                 |                      |                    |
| <i>parC</i>      | Forward    | ATAGGGTATTATCTGCGGC      | 55°C            | 2.5                  | 2283               |
|                  | Reverse    | GAATAACAACGGTTTTACG      |                 |                      |                    |
|                  | Sequencing | ATAGGGTATTATCTGCGGC      |                 |                      |                    |
| <i>parE</i>      | Forward    | TGCACAGTTGCTGACAATC      | 55°C            | 2                    | 1893               |
|                  | Reverse    | TCGGATTCTTATCCGGCCTG     |                 |                      |                    |
|                  | Sequencing | CTGTGGCTGAACCAGAAC       |                 |                      |                    |
| <i>blaCTXM15</i> | Forward    | GATGTGCAGCACCAGTAAAG     | 52°C            | 0.5                  | 549                |
|                  | Reverse    | AACGATATCGCGGTGATCTG     |                 |                      |                    |
| <i>macA</i>      | Forward    | CTGTAAGCTGTGTCATGATCG    | 52°C            | 1                    | 1308               |
|                  | Reverse    | CTCACATTGCACAGTTCAAGC    |                 |                      |                    |
|                  | Sequencing | CTGTAAGCTGTGTCATGATCG    |                 |                      |                    |
| <i>acrB(1)</i>   | Forward    | GGTTAAAGTGCAGGAAATTACCG  | 50°C            | 1.5                  | 1695               |
|                  | Reverse    | CTACGCTATCGGTGTAGTGAT    |                 |                      |                    |
| <i>acrB(2)</i>   | Forward    | GACGATGCTCAAACCCGT       | 50°C            | 1.5                  | 1820               |
|                  | Reverse    | GCCAACTTTCCTAAGAAAAAGCC  |                 |                      |                    |
|                  | Sequencing | GACTTCGAGTTGATTGACCA     |                 |                      |                    |
| <i>acrR</i>      | Forward    | CACCGACATATGGCACGAA      | 52°C            | 1                    | 633                |
|                  | Reverse    | CAGCGTCGGACACAATTGATA    |                 |                      |                    |
|                  | Sequencing | GAAAGTTACGATCGGATTGA     |                 |                      |                    |

57

58 **Table 4. Sequencing results associated with fluoroquinolone resistance, related to Fig. 3.**

| Genes       | Mutations    | References   | Findings         |
|-------------|--------------|--------------|------------------|
| <i>gyrA</i> | M52L         | (14)         | <b>Wild type</b> |
|             | G81C         | (16)         | <b>Wild type</b> |
|             | D82G         | (16)         | <b>Wild type</b> |
|             | S83F/Y/L     | (13, 20)     | <b>S83F</b>      |
|             | D87Y/H/N/G/A | (13, 20, 48) | <b>Wild type</b> |
|             | A119E        | (16)         | <b>Wild type</b> |
| <i>gyrB</i> | S464Y/F/T    | (17)         | <b>Wild type</b> |
|             | Q465L        |              | <b>Wild type</b> |
|             | E466D        |              | <b>Wild type</b> |
|             | A468E        |              | <b>Wild type</b> |
| <i>parC</i> | T57S         | (18, 19)     | <b>Wild type</b> |
|             | G72S         | (13)         | <b>Wild type</b> |
|             | G78D         | (16)         | <b>Wild type</b> |
|             | D79G/R       | (16, 18)     | <b>Wild type</b> |
|             | S80R/I       | (16, 20)     | <b>Wild type</b> |
|             | G84G/K       | (18, 20)     | <b>Wild type</b> |
|             | W106G        | (15)         | <b>Wild type</b> |
| <i>parE</i> | D420N        | (20)         | <b>Wild type</b> |
|             | Y434S        | (18)         | <b>Wild type</b> |
|             | S458P        | (16)         | <b>Wild type</b> |

59

60 **Table 5. Details of the 107 completed *S. Typhi* genomes used in the study, related to Fig. 6.**

| Accession number | Assembly number  | BioProject  | BioSample    | BioSample ID | Serovar |
|------------------|------------------|-------------|--------------|--------------|---------|
| GCF_000007545.1  | ASM754v1         | PRJNA371    | SAMN02604095 | 2604095      | Typhi   |
| GCF_000195995.1  | ASM19599v1       | PRJNA236    | SAMEA1705914 | 25445        | Typhi   |
| GCF_000245535.1  | ASM24553v1       | PRJNA80939  | SAMN02603101 | 2603101      | Typhi   |
| GCF_000385905.1  | ASM38590v1       | PRJNA34855  | SAMN02603210 | 2603210      | Typhi   |
| GCF_001048035.2  | ERL103914        | PRJEB3215   | SAMEA2072815 | 2363281      | Typhi   |
| GCF_001048375.2  | M223             | PRJEB3215   | SAMEA2156512 | 2372886      | Typhi   |
| GCF_001095585.2  | ERL114000        | PRJEB3215   | SAMEA2072817 | 2363290      | Typhi   |
| GCF_001104165.2  | E00-7866         | PRJEB3215   | SAMEA2072798 | 2363309      | Typhi   |
| GCF_001104885.2  | 10349_1#89_2     | PRJEB3215   | SAMEA2072799 | 2363310      | Typhi   |
| GCF_001118185.2  | H12ESR00394-001A | PRJEB3215   | SAMEA2150110 | 2379332      | Typhi   |
| GCF_001119245.2  | 76_1292          | PRJEB3215   | SAMEA1930246 | 2387556      | Typhi   |
| GCF_001121865.2  | 404Ty            | PRJEB3215   | SAMEA2072936 | 2363311      | Typhi   |
| GCF_001127485.2  | ERL041834        | PRJEB3215   | SAMEA2072498 | 2363237      | Typhi   |
| GCF_001135805.2  | ERL072973        | PRJEB3215   | SAMEA2072503 | 2363252      | Typhi   |
| GCF_001148125.2  | ERL024120        | PRJEB3215   | SAMEA2072494 | 2363225      | Typhi   |
| GCF_001148305.2  | ERL082356        | PRJEB3215   | SAMEA2072647 | 2363255      | Typhi   |
| GCF_001163025.2  | H12ESR04734-001A | PRJEB3215   | SAMEA2072794 | 2363303      | Typhi   |
| GCF_001165785.2  | ERL024919        | PRJEB3215   | SAMEA2072495 | 2363228      | Typhi   |
| GCF_001302605.1  | ASM130260v1      | PRJNA286155 | SAMN03765654 | 3765654      | Typhi   |
| GCF_001357935.2  | 80_2002          | PRJEB3215   | SAMEA1930249 | 2387559      | Typhi   |
| GCF_001360555.2  | 2010_7898        | PRJEB3215   | SAMEA2058419 | 2301303      | Typhi   |
| GCF_001362095.2  | 034151_4         | PRJEB3215   | SAMEA2072676 | 2363233      | Typhi   |
| GCF_001362135.2  | 11909_3          | PRJEB3215   | SAMEA2072788 | 2363294      | Typhi   |
| GCF_001362195.2  | H12ESR00755-001A | PRJEB3215   | SAMEA2072793 | 2363301      | Typhi   |
| GCF_001362335.2  | Ty2              | PRJEB3215   | SAMEA2072934 | 2363305      | Typhi   |
| GCF_003429465.1  | ASM342946v1      | PRJNA398278 | SAMN07507058 | 7507058      | Typhi   |
| GCF_003716995.1  | ASM371699v1      | PRJNA474465 | SAMN09320528 | 9320528      | Typhi   |
| GCF_003717015.1  | ASM371701v1      | PRJNA474465 | SAMN09320527 | 9320527      | Typhi   |
| GCF_003717035.1  | ASM371703v1      | PRJNA474465 | SAMN09320526 | 9320526      | Typhi   |
| GCF_003717055.1  | ASM371705v1      | PRJNA474465 | SAMN09320523 | 9320523      | Typhi   |
| GCF_003717075.1  | ASM371707v1      | PRJNA474465 | SAMN09320522 | 9320522      | Typhi   |
| GCF_003717095.1  | ASM371709v1      | PRJNA474465 | SAMN09320521 | 9320521      | Typhi   |
| GCF_003717115.1  | ASM371711v1      | PRJNA474465 | SAMN09320520 | 9320520      | Typhi   |
| GCF_003717135.1  | ASM371713v1      | PRJNA474465 | SAMN09320519 | 9320519      | Typhi   |
| GCF_003717215.1  | ASM371721v1      | PRJNA474465 | SAMN09320518 | 9320518      | Typhi   |
| GCF_003717285.1  | ASM371728v1      | PRJNA474465 | SAMN09320517 | 9320517      | Typhi   |
| GCF_003717355.1  | ASM371735v1      | PRJNA474465 | SAMN09320516 | 9320516      | Typhi   |
| GCF_003717395.1  | ASM371739v1      | PRJNA474465 | SAMN09320514 | 9320514      | Typhi   |
| GCF_003717435.1  | ASM371743v1      | PRJNA474465 | SAMN09320513 | 9320513      | Typhi   |
| GCF_003717455.1  | ASM371745v1      | PRJNA474465 | SAMN09320512 | 9320512      | Typhi   |
| GCF_003717475.1  | ASM371747v1      | PRJNA474465 | SAMN09320511 | 9320511      | Typhi   |
| GCF_003717515.1  | ASM371751v1      | PRJNA474465 | SAMN09320510 | 9320510      | Typhi   |
| GCF_003717535.1  | ASM371753v1      | PRJNA474465 | SAMN09320509 | 9320509      | Typhi   |

|                 |             |             |              |         |       |
|-----------------|-------------|-------------|--------------|---------|-------|
| GCF_003717575.1 | ASM371757v1 | PRJNA474465 | SAMN09320507 | 9320507 | Typhi |
| GCF_003717615.1 | ASM371761v1 | PRJNA474465 | SAMN09320564 | 9320564 | Typhi |
| GCF_003717635.1 | ASM371763v1 | PRJNA474465 | SAMN09320563 | 9320563 | Typhi |
| GCF_003717655.1 | ASM371765v1 | PRJNA474465 | SAMN09320562 | 9320562 | Typhi |
| GCF_003717675.1 | ASM371767v1 | PRJNA474465 | SAMN09320561 | 9320561 | Typhi |
| GCF_003717695.1 | ASM371769v1 | PRJNA474465 | SAMN09320560 | 9320560 | Typhi |
| GCF_003717715.1 | ASM371771v1 | PRJNA474465 | SAMN09320559 | 9320559 | Typhi |
| GCF_003717735.1 | ASM371773v1 | PRJNA474465 | SAMN09320558 | 9320558 | Typhi |
| GCF_003717755.1 | ASM371775v1 | PRJNA474465 | SAMN09320557 | 9320557 | Typhi |
| GCF_003717775.1 | ASM371777v1 | PRJNA474465 | SAMN09320556 | 9320556 | Typhi |
| GCF_003717795.1 | ASM371779v1 | PRJNA474465 | SAMN09320555 | 9320555 | Typhi |
| GCF_003717815.1 | ASM371781v1 | PRJNA474465 | SAMN09320554 | 9320554 | Typhi |
| GCF_003717835.1 | ASM371783v1 | PRJNA474465 | SAMN09320553 | 9320553 | Typhi |
| GCF_003717855.1 | ASM371785v1 | PRJNA474465 | SAMN09320552 | 9320552 | Typhi |
| GCF_003717875.1 | ASM371787v1 | PRJNA474465 | SAMN09320551 | 9320551 | Typhi |
| GCF_003717895.1 | ASM371789v1 | PRJNA474465 | SAMN09320550 | 9320550 | Typhi |
| GCF_003717915.1 | ASM371791v1 | PRJNA474465 | SAMN09320549 | 9320549 | Typhi |
| GCF_003717935.1 | ASM371793v1 | PRJNA474465 | SAMN09320548 | 9320548 | Typhi |
| GCF_003717955.1 | ASM371795v1 | PRJNA474465 | SAMN09320547 | 9320547 | Typhi |
| GCF_003717975.1 | ASM371797v1 | PRJNA474465 | SAMN09320546 | 9320546 | Typhi |
| GCF_003717995.1 | ASM371799v1 | PRJNA474465 | SAMN09320545 | 9320545 | Typhi |
| GCF_003718015.1 | ASM371801v1 | PRJNA474465 | SAMN09320544 | 9320544 | Typhi |
| GCF_003718035.1 | ASM371803v1 | PRJNA474465 | SAMN09320543 | 9320543 | Typhi |
| GCF_003718055.1 | ASM371805v1 | PRJNA474465 | SAMN09320542 | 9320542 | Typhi |
| GCF_003718075.1 | ASM371807v1 | PRJNA474465 | SAMN09320541 | 9320541 | Typhi |
| GCF_003718095.1 | ASM371809v1 | PRJNA474465 | SAMN09320540 | 9320540 | Typhi |
| GCF_003718115.1 | ASM371811v1 | PRJNA474465 | SAMN09320539 | 9320539 | Typhi |
| GCF_003718135.1 | ASM371813v1 | PRJNA474465 | SAMN09320538 | 9320538 | Typhi |
| GCF_003718155.1 | ASM371815v1 | PRJNA474465 | SAMN09320537 | 9320537 | Typhi |
| GCF_003718175.1 | ASM371817v1 | PRJNA474465 | SAMN09320536 | 9320536 | Typhi |
| GCF_003718195.1 | ASM371819v1 | PRJNA474465 | SAMN09320535 | 9320535 | Typhi |
| GCF_003718235.1 | ASM371823v1 | PRJNA474465 | SAMN09320533 | 9320533 | Typhi |
| GCF_003718255.1 | ASM371825v1 | PRJNA474465 | SAMN09320532 | 9320532 | Typhi |
| GCF_003718275.1 | ASM371827v1 | PRJNA474465 | SAMN09320531 | 9320531 | Typhi |
| GCF_003718295.1 | ASM371829v1 | PRJNA474465 | SAMN09320530 | 9320530 | Typhi |
| GCF_003718315.1 | ASM371831v1 | PRJNA474465 | SAMN09320529 | 9320529 | Typhi |
| GCF_003718355.1 | ASM371835v1 | PRJNA474465 | SAMN09320578 | 9320578 | Typhi |
| GCF_003718375.1 | ASM371837v1 | PRJNA474465 | SAMN09320577 | 9320577 | Typhi |
| GCF_003718395.1 | ASM371839v1 | PRJNA474465 | SAMN09320576 | 9320576 | Typhi |
| GCF_003718415.1 | ASM371841v1 | PRJNA474465 | SAMN09320575 | 9320575 | Typhi |
| GCF_003718435.1 | ASM371843v1 | PRJNA474465 | SAMN09320574 | 9320574 | Typhi |
| GCF_003718455.1 | ASM371845v1 | PRJNA474465 | SAMN09320573 | 9320573 | Typhi |
| GCF_003718475.1 | ASM371847v1 | PRJNA474465 | SAMN09320572 | 9320572 | Typhi |
| GCF_003718495.1 | ASM371849v1 | PRJNA474465 | SAMN09320571 | 9320571 | Typhi |
| GCF_003718515.1 | ASM371851v1 | PRJNA474465 | SAMN09320570 | 9320570 | Typhi |
| GCF_003718535.1 | ASM371853v1 | PRJNA474465 | SAMN09320569 | 9320569 | Typhi |
| GCF_003718555.1 | ASM371855v1 | PRJNA474465 | SAMN09320568 | 9320568 | Typhi |
| GCF_003718575.1 | ASM371857v1 | PRJNA474465 | SAMN09320567 | 9320567 | Typhi |
| GCF_003718595.1 | ASM371859v1 | PRJNA474465 | SAMN09320566 | 9320566 | Typhi |

|                 |                    |             |                    |          |       |
|-----------------|--------------------|-------------|--------------------|----------|-------|
| GCF_003718615.1 | ASM371861v1        | PRJNA474465 | SAMN09320565       | 9320565  | Typhi |
| GCF_003718635.1 | ASM371863v1        | PRJNA474465 | SAMN09320525       | 9320525  | Typhi |
| GCF_003718655.1 | ASM371865v1        | PRJNA474465 | SAMN09320506       | 9320506  | Typhi |
| GCF_003719215.1 | ASM371921v1        | PRJNA474465 | SAMN09320534       | 9320534  | Typhi |
| GCF_003719235.1 | ASM371923v1        | PRJNA474465 | SAMN09320508       | 9320508  | Typhi |
| GCF_003719255.1 | ASM371925v1        | PRJNA474465 | SAMN09320515       | 9320515  | Typhi |
| GCF_003719555.1 | ASM371955v1        | PRJNA471337 | SAMN09208111       | 9208111  | Typhi |
| GCF_004136335.1 | ASM413633v1        | PRJNA480202 | SAMN09630442       | 9630442  | Typhi |
| GCF_005885835.1 | ASM588583v1        | PRJNA543969 | SAMN11792777       | 11792777 | Typhi |
| GCF_900185485.1 | BL60006            | PRJEB21155  | SAMEA1041091<br>93 | 7190870  | Typhi |
| GCF_900205255.1 | 1554               | PRJEB5919   | SAMEA3109638       | 3338098  | Typhi |
| GCF_900205265.1 | lupe_GEN005<br>9_5 | PRJEB5919   | SAMEA2564024       | 3071773  | Typhi |
| GCF_900205275.1 | 403Ty              | PRJEB5919   | SAMEA2564027       | 3071775  | Typhi |
| GCF_900205295.1 | E98-3139           | PRJEB5919   | SAMEA2467787       | 3000319  | Typhi |
| GCF_901457615.1 | ERS3381924         | PRJEB32272  | SAMEA5577690       | 11516613 | Typhi |

61
